# Supplementary material for: Effect of morphology on interactions between nanoparticle-stabilised air bubbles and oil droplets
Source: Royal Society of Chemistry journal article supplement (doi:10.1039/c7sm02280h), 2018-01-01
Supplement: c7sm02280h1.pdf [file c7sm02280h1.pdf]

# Effect of morphology on interactions between nanoparticle-stabilised air bubbles and oil droplets

Victoria J. Cunningham,<sup>a#</sup> Emma C. Giakoumatos,<sup>b§</sup> Melissa Marks<sup>b</sup>, Steven P. Armes<sup>a</sup> and Erica J. Wanless<sup>b\*</sup>

a. Department of Chemistry, University of Sheffield, Brook Hill, Sheffield, South Yorkshire, S3 7HF, UK

b. Priority Research Centre for Advanced Particle Processing and Transport, University of Newcastle, Callaghan, NSW, 2308, Australia.

# Current address: Scott Bader Company Ltd., Wollaston, Wellingborough, Northamptonshire, NN29 7RL, UK.

§ Current address: Institute of Complex Molecular Systems, Eindhoven University of Technology, The Netherlands

\* Corresponding author: [Erica.wanless@newcastle.edu.au](mailto:Erica.wanless@newcastle.edu.au)

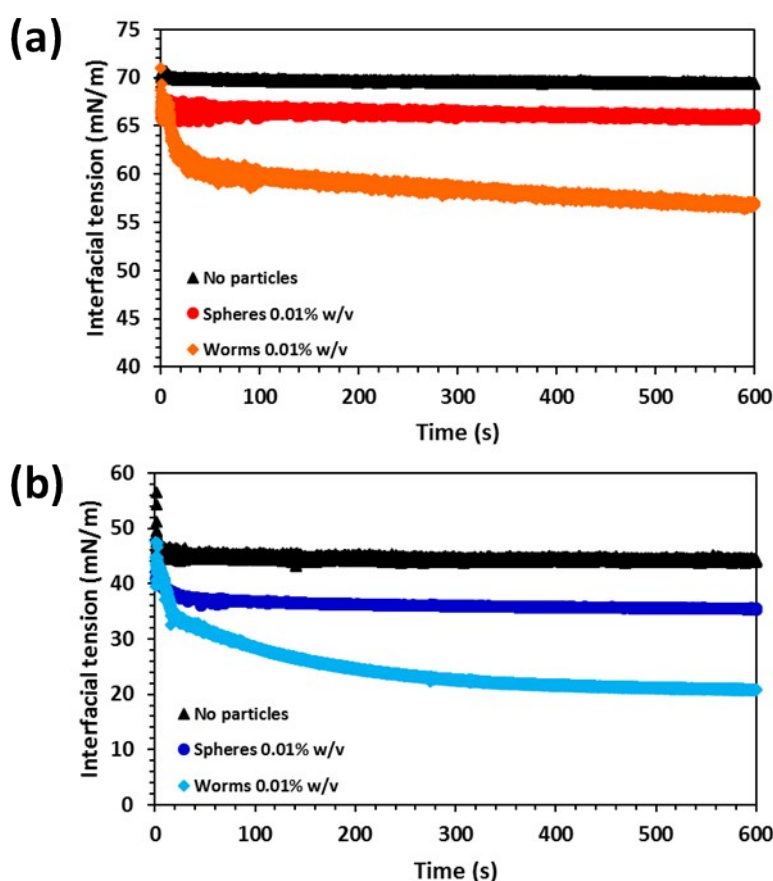

**Figure S1.** Interfacial tension profiles for (a) air bubbles or (b) *n*-dodecane droplets; aged over 10 min in 0.01% w/v aqueous dispersions of either 22 nm PGMA<sub>39</sub>-PBzMA<sub>60</sub> spheres or PGMA<sub>37</sub>-PHPMA<sub>60</sub>-PBzMA<sub>30</sub> worms of similar diameter without any stirring. Also shown are the interfacial tension data obtained for either an *n*-dodecane droplet or an air bubble immersed in water in the absence of any nanoparticles.

### (a) Spheres

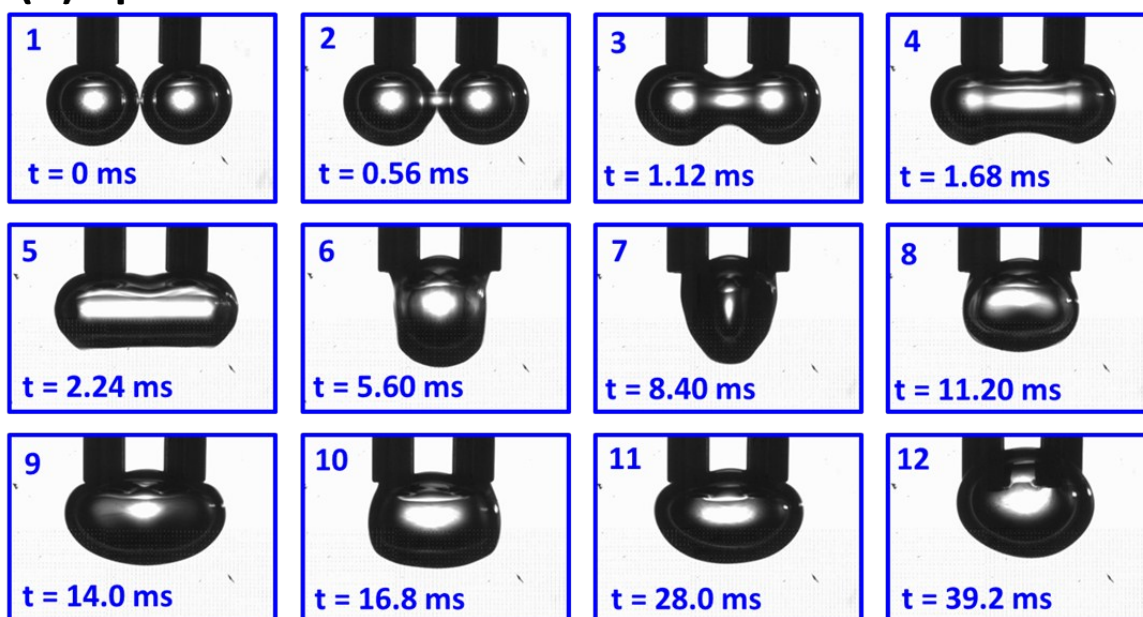

### (b) Worms

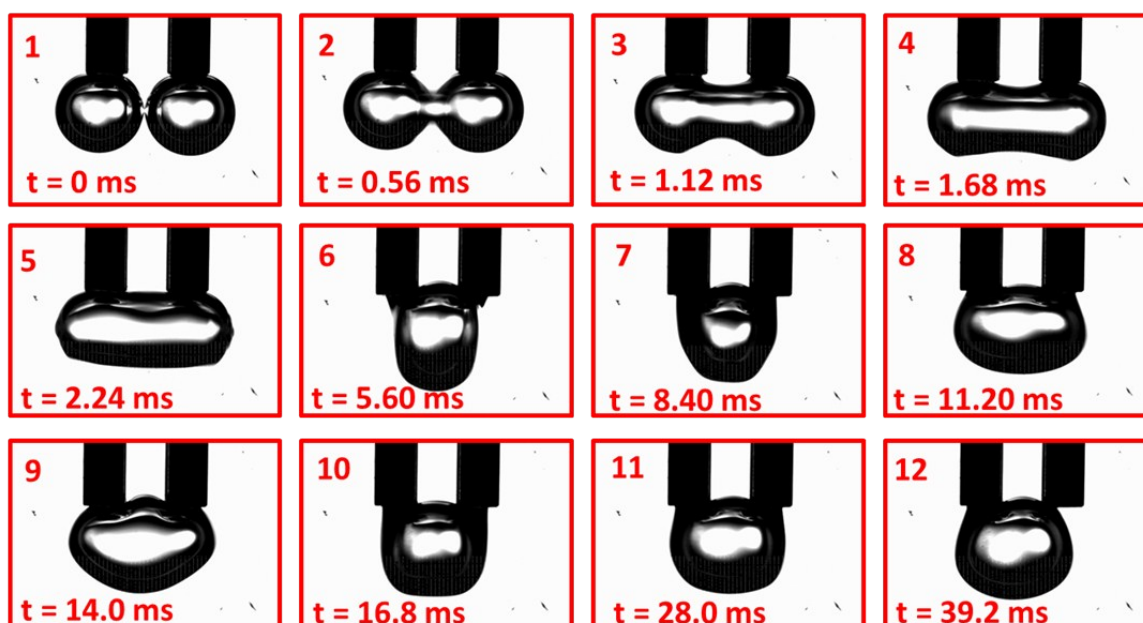

**Figure S2.** Sequence of digital images recorded at various time intervals during the coalescence of two air bubbles prepared using a 0.01% w/v aqueous dispersion of either (a) 22 nm PGMA<sub>39</sub>-PBzMA<sub>60</sub> spheres or (b) PGMA<sub>37</sub>-PHPMA<sub>60</sub>-PBzMA<sub>30</sub> worms brought into close contact after no ageing. The outer diameter of each capillary is 1.05 mm

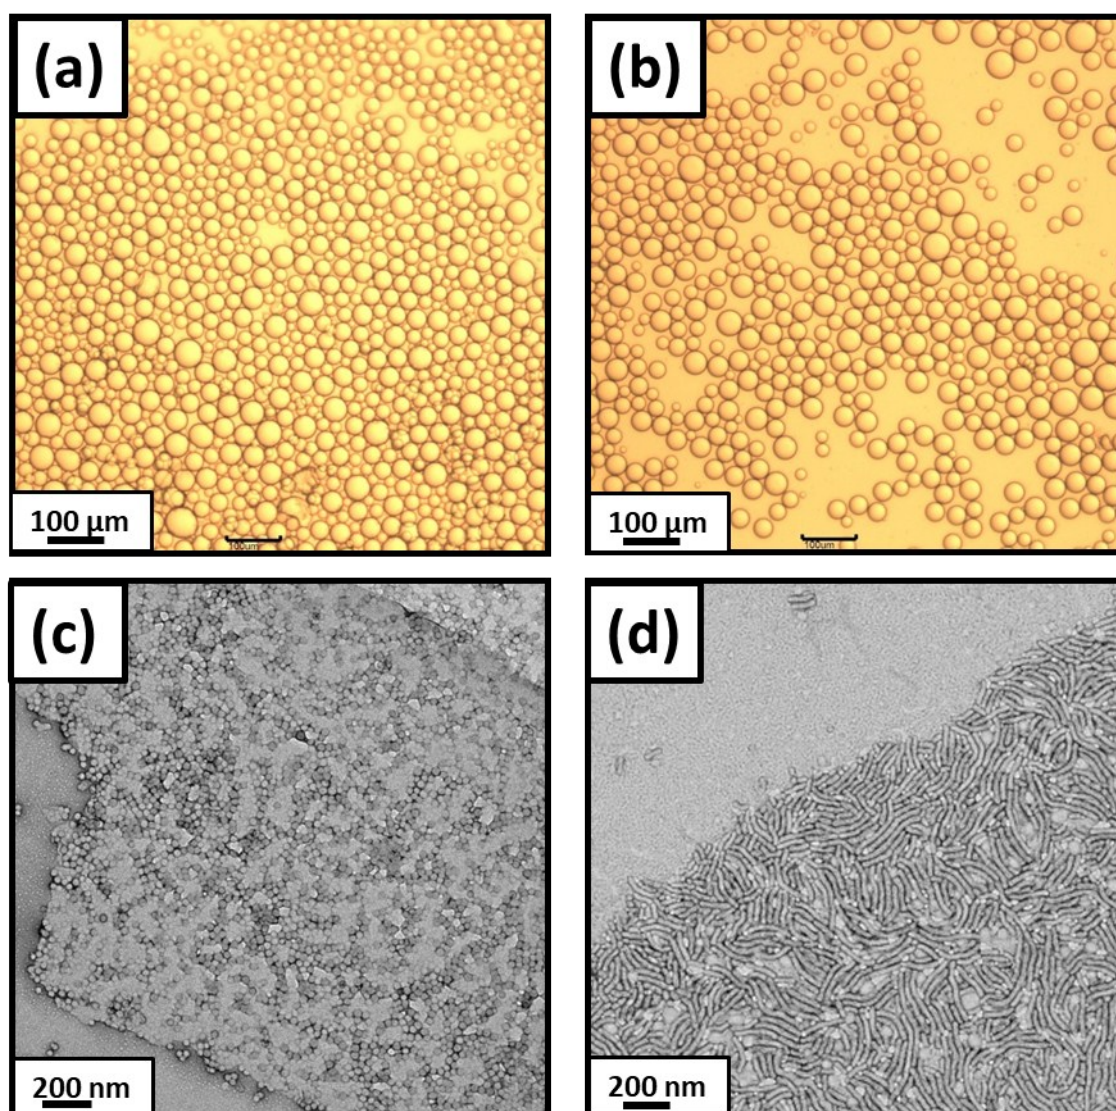

**Figure S3.** Optical microscopy and TEM images recorded for *n*-dodecane-in-water Pickering emulsions prepared using a 0.50% w/v aqueous dispersion of either PGMA<sub>39</sub>-PBzMA<sub>60</sub> spheres (a, c) or PGMA<sub>37</sub>-PHPMA<sub>60</sub>-PBzMA<sub>30</sub> worms (b, d) after high-shear homogenisation at 13 200 rpm for 2 min.
